# Supplementary material for: Efficiency of Sidestream Nitritation for Modern Two-Stage Activated Sludge Plants
Source: MDPI journal article supplement (doi:10.3390/ijerph191912871), 2022-10-08

# Supplementary Material

## S1: SDE Treatment Concepts

### 1) single-stage WWTP, SDE treatment in mainstream

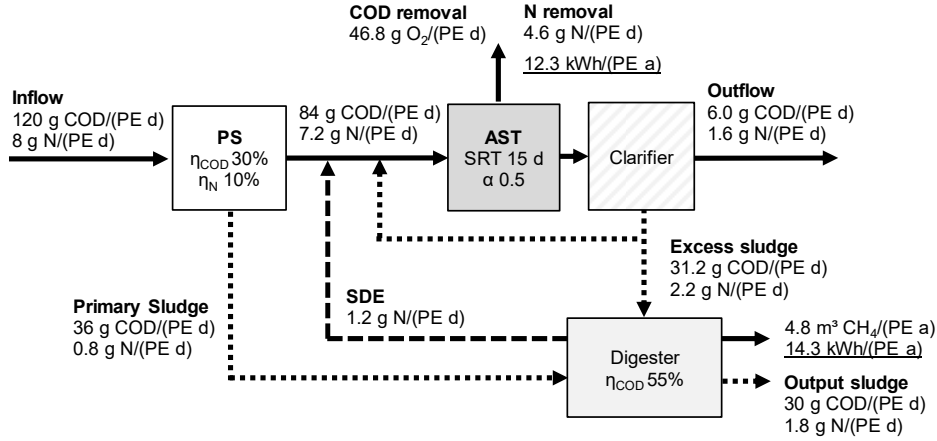

### 2) single-stage WWTP, SDE treatment via nitritation

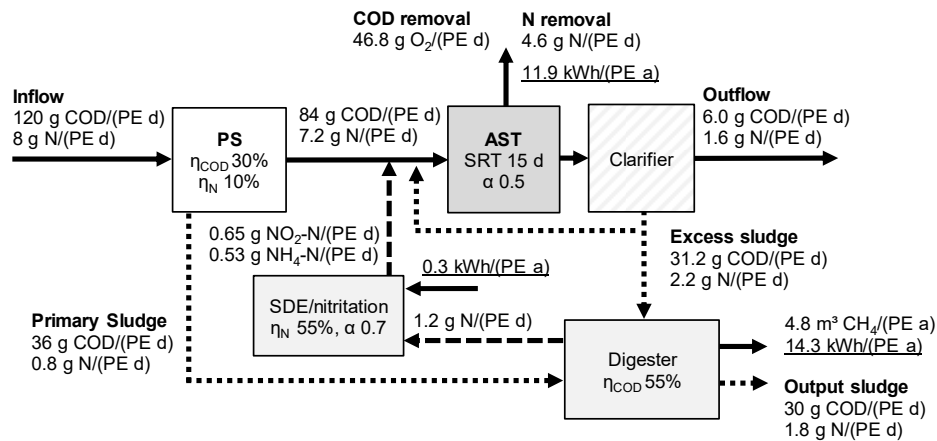

### 3) single-stage WWTP, SDE treatment via anammox

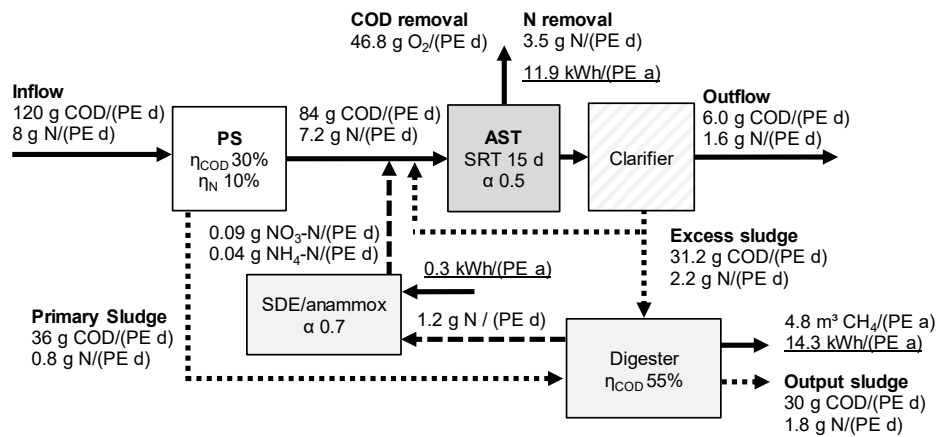

#### 4) two-stage WWTP, SDE treatment in mainstream

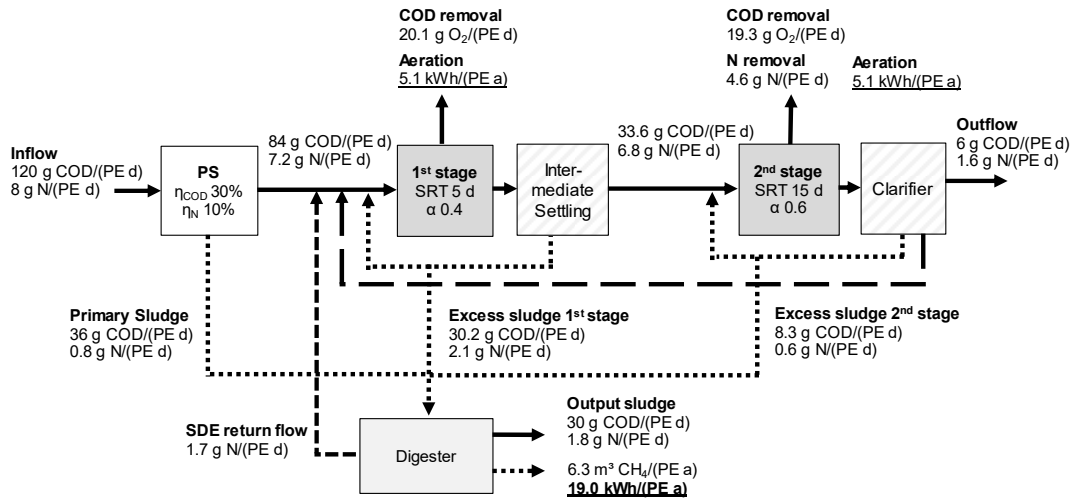

#### 5) two-stage WWTP, SDE treatment via nitritation

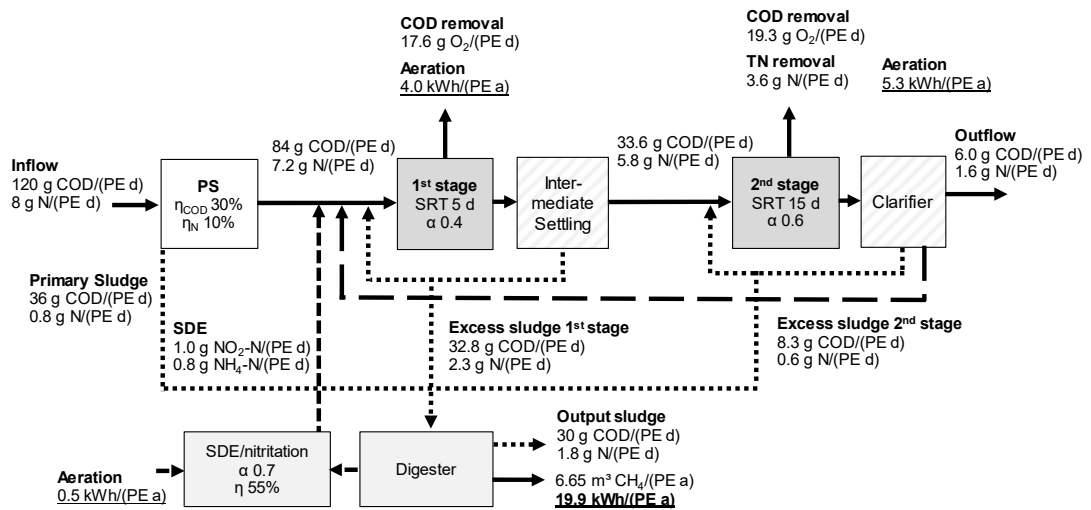

#### 6) two-stage WWTP, SDE treatment via anammox

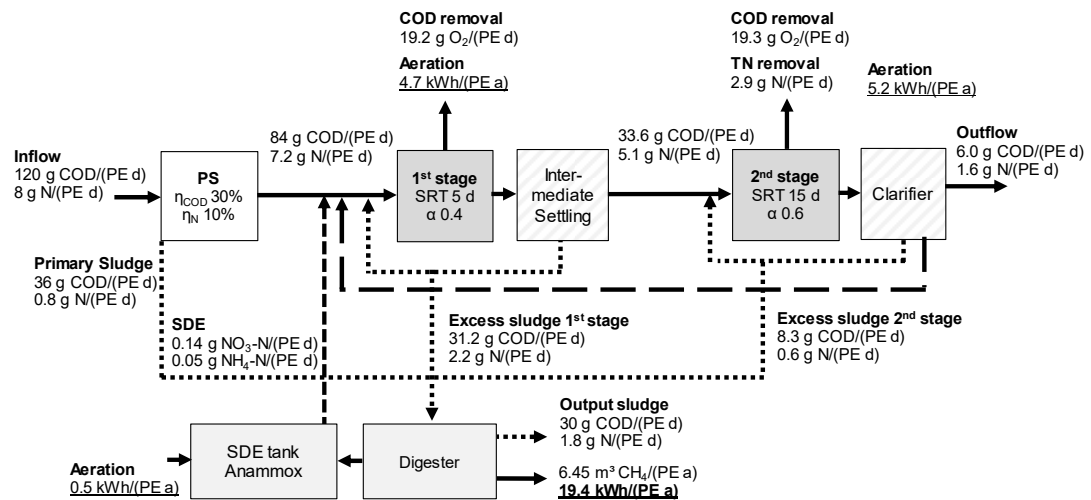

Supplement: s1 [file s1]
